# Supplementary material for: Clinical Impact of Consolidative and Salvage Radiotherapy for Lymph Node Metastasis in Upper Urinary Tract Urothelial Carcinoma
Source: Case Rep Urol. 2018 Apr 22;2018:1471839. doi: 10.1155/2018/1471839 (PMC5937622; doi:10.1155/2018/1471839)
Supplement: Supplementary 3 — Table S1: lymph nodes of clinical course of the case. [file 1471839.f3.xlsx]

## Sheet: Sheet1
	Table S1. Lymph nodes of clinical course of the case.
	Days after the first visit (days)	Treatment	CT#			Size of lymph nodes (mm)
						obturator									common iliac									para-aorta #1									para-aorta #2
						evaluators				average		SD	p value (t-test)		evaluators				average		SD	p value (t-test)		evaluators				average		SD	p value (t-test)		evaluators				average		SD	p value (t-test)
						1	2	3	4						1	2	3	4						1	2	3	4						1	2	3	4
	0	first visit
	9		1	*		17.7	17.5	18	16.8	17.5	±	0.509902			6.9	6.8	6	6.7	6.6	±	0.408248			6.7	7.7	5.6	6.9	6.725	±	0.865544			4.9	5	4.7	5.5	5.025	±	0.340343
	62	GC #1 - 6 $
	269		2	*		8.6	6.9	9.4	8.7	8.4	±	1.06145	<0.001	a	11.2	10.4	11	11.2	10.95	±	0.378594	<0.001	a	6.3	6.3	6.8	6.3	6.425	±	0.25	0.53018	a	7.1	5.9	7.6	7.7	7.075	±	0.826136	0.00373606	a
	289	NU
	335		3	*											21.3	21.7	22.9	22.7	22.15	±	0.772442	<0.001	b	12.5	14	11.8	12.6	12.725	±	0.921502	<0.001	b	17.1	18.1	16.3	16.8	17.075	±	0.758837	<0.001	b
	346	GC #7 - 8
	403		4	*											16.4	14.3	15.6	15.5	15.45	±	0.866025	<0.001	c	12.8	11.7	11.9	12.2	12.15	±	0.479583	0.310684	c	7.9	7.2	8.7	7.6	7.85	±	0.635085	<0.001	c
	419	GC #9 - 10
	487		5	*											22.8	22.6	24.1	22.6	23.025	±	0.722842	<0.001	d	10.4	8.4	10.6	11.3	10.175	±	1.24466	0.025239	d	11.6	12	11.5	12.3	11.85	±	0.369685	<0.001	d
	493	GP #1 - 2
	548		6												11.5	9.8	10.8	10	10.525	±	0.780491			5.9	4.7	5.6	5.6	5.45	±	0.519615			11.9	10.9	13.7	12.2	12.175	±	1.15866
	556	GP #3 - 4
	605		7												7.1	8.2	9.1	8.5	8.225	±	0.838153			4.4	5.1	3.9	5.1	4.625	±	0.585235			13.4	11.7	12.1	14.2	12.85	±	1.15614
	612	GP #5 - 6
	661		8												6.9	5	5.9	7.2	6.25	±	1.00167			5.2	4.4	5.4	5.5	5.125	±	0.499166			15.9	16.8	15.9	16.1	16.175	±	0.4272
	682	GP #7 - 8
	737		9	*											5.9	6.4	4.9	6.1	5.825	±	0.65	<0.001	e	5.2	6.2	6.5	5.3	5.8	±	0.648074	0.000787411	e	21.3	21.2	21.6	21.9	21.5	±	0.316228	<0.001	e
	752	RT
	812		10												6.7	5.2	5.7	6.6	6.05	±	0.723418			3.8	3.8	3.8	3.9	3.825	±	0.05			13.8	14.8	13.6	13.1	13.825	±	0.713559
	857		11												5.5	4.4	4.7	5.2	4.95	±	0.493288			3.6	3.6	4.3	4.4	3.975	±	0.434933			8.7	8.6	9.3	8.9	8.875	±	0.30957
	899		12												4.3	5.4	4.8	4.4	4.725	±	0.499166			4.1	4.6	4.2	4.7	4.4	±	0.294392			8.6	8.7	9.3	8.5	8.775	±	0.359398
	969		13												4.3	3.8	5.4	4.7	4.55	±	0.675771			5	5.3	4	5.4	4.925	±	0.639661			8.2	8.8	8.9	8.1	8.5	±	0.408248
	1032		14												4.2	5.4	5.5	4.3	4.85	±	0.695222			3.5	4.1	4.1	3.9	3.9	±	0.282843			7.2	7.1	7.7	7.3	7.325	±	0.262996
	1102		15												5.5	5.3	4.2	5.7	5.175	±	0.670199			3.6	3.2	5.1	4	3.975	±	0.818026			7.1	6	8.7	7	7.2	±	1.11654
	1193		16												4.5	4.6	5.7	4.7	4.875	±	0.556028			3	2.7	4.6	3.5	3.45	±	0.834666			6.4	7.3	7.3	7	7	±	0.424264
	1291		17												4.4	4.7	5.2	4.6	4.725	±	0.340343			4.3	3.9	4.9	4.3	4.35	±	0.412311			5.9	6.9	6.8	6	6.4	±	0.522813
	1382		18												3.6	3.2	3.2	4	3.5	±	0.382971			3.3	2.9	2.7	3	2.975	±	0.25			5.4	6.3	6	5.8	5.875	±	0.377492
	1473		19	*											2.4	3.2	3	3	2.9	±	0.34641	<0.001	f	3.2	2.6	4.2	3	3.25	±	0.680686	0.00162306	f	5.2	6	4.8	5.4	5.35	±	0.5	<0.001	f
	The size of lymph nodes were measured by four evaluators. *: The important CT was shown in Figure 1. $: The ureteral tumor was evaluated by MRI (Supple Figure 1). a to f: compared with CT#1, #2, #3, #4, #5, and #9 SD: standard deviation, GC: gemcitabine and cisplatin chemotherapy, RNU: radical nephroureterectomy, GP: gemcitabine and paclitaxel chemotherapy, RT: radiotherapy
